# Supplementary material
Source: PubMed Central journal article supplement (PMC8580300)
Supplement: NIHMS1744407-supplement-Supplementary_Material.pdf [file NIHMS1744407-supplement-Supplementary_Material.pdf]

## Supplement for: Bayesian Multivariate Mixed-Effects Location Scale Modeling of Longitudinal Relations among Affective Traits, States, and Physical Activity

Philippe Rast

9/23/2020

### Library and Data

Load library and download data from osf repository

Subset the data for this example to reduce computation time: Select 30 individuals randomly

```
set.seed(6648)
subset_id <- sample(x = unique(dat$record_id ), 30)

## subset with given 30 individuals
dats <- dat[dat$record_id %in% subset_id, ]
```

### Standard mixed effects location scale model

```
fit_melsm <- brm(bf(
  ## Location
  P_A.std ~ 1 + day + P_A.lag + N_A.lag + steps.pm*steps.pmd + (1 + day +
steps.pmd | c | record_id),
  ## scale (the c in |c| allows for correlation between location and
scale)
  sigma ~ 1 + P_A.lag + N_A.lag + steps.pm*steps.pmd + (1 + steps.pmd | c |
record_id),
  data=dats, inits = 0,
  ## sample prior for Bayes factors
  cores = 4, sample_prior = T)
```

Print the estimates with information on credible intervals, Rhats and effective sample size. The correlations among random effects for both location and scale are in “Group-Level Effects” and are denoted by `cor()`

```
summary(fit_melsm )

## Family: gaussian
## Links: mu = identity; sigma = log
## Formula: P_A.std ~ 1 + day + P_A.lag + N_A.lag + steps.pm * steps.pmd + (1
+ day + steps.pmd | c | record_id)
##          sigma ~ 1 + P_A.lag + N_A.lag + steps.pm * steps.pmd + (1 +
steps.pmd | c | record_id)
```

```

## Data: dats (Number of observations: 1851)
## Samples: 4 chains, each with iter = 2000; warmup = 1000; thin = 1;
## total post-warmup samples = 4000
##
## Group-Level Effects:
## ~record_id (Number of levels: 30)
##
## Estimate Est.Error l-95% CI u-95% CI
Rhat
## sd(Intercept) 0.68 0.10 0.51 0.90
1.00
## sd(day) 0.01 0.00 0.00 0.01
1.00
## sd(steps.pmd) 0.13 0.03 0.09 0.19
1.00
## sd(sigma_Intercept) 0.54 0.08 0.40 0.73
1.00
## sd(sigma_steps.pmd) 0.12 0.05 0.03 0.22
1.00
## cor(Intercept,day) -0.29 0.18 -0.62 0.09
1.00
## cor(Intercept,steps.pmd) -0.14 0.20 -0.52 0.27
1.00
## cor(day,steps.pmd) -0.38 0.23 -0.77 0.13
1.00
## cor(Intercept,sigma_Intercept) -0.27 0.18 -0.60 0.09
1.00
## cor(day,sigma_Intercept) -0.01 0.22 -0.45 0.43
1.00
## cor(steps.pmd,sigma_Intercept) 0.35 0.20 -0.08 0.69
1.00
## cor(Intercept,sigma_steps.pmd) -0.35 0.24 -0.76 0.16
1.00
## cor(day,sigma_steps.pmd) 0.01 0.28 -0.53 0.55
1.00
## cor(steps.pmd,sigma_steps.pmd) -0.08 0.29 -0.63 0.48
1.00
## cor(sigma_Intercept,sigma_steps.pmd) 0.24 0.27 -0.32 0.73
1.00
## Bulk_ESS Tail_ESS
## sd(Intercept) 1173 2088
## sd(day) 1809 2264
## sd(steps.pmd) 2567 2706
## sd(sigma_Intercept) 2276 2828
## sd(sigma_steps.pmd) 945 1272
## cor(Intercept,day) 1793 2363
## cor(Intercept,steps.pmd) 2825 2611
## cor(day,steps.pmd) 2109 2744
## cor(Intercept,sigma_Intercept) 2547 2616
## cor(day,sigma_Intercept) 1364 1949
## cor(steps.pmd,sigma_Intercept) 1243 2117

```

```

## cor(Intercept,sigma_steps.pmd)          3553    2827
## cor(day,sigma_steps.pmd)                3452    2519
## cor(steps.pmd,sigma_steps.pmd)         3765    3165
## cor(sigma_Intercept,sigma_steps.pmd)   3681    2932
##
## Population-Level Effects:
##           Estimate Est.Error l-95% CI u-95% CI Rhat
Bulk_ESS
## Intercept          -0.04     0.12   -0.29    0.19 1.00
923
## sigma_Intercept    -0.82     0.10   -1.03   -0.62 1.00
2052
## day                -0.00     0.00   -0.00    0.00 1.00
1469
## P_A.lag            0.33     0.02    0.29    0.38 1.00
5447
## N_A.lag            0.05     0.02    0.01    0.09 1.00
7003
## steps.pm           0.17     0.18   -0.18    0.54 1.00
1225
## steps.pmd          0.15     0.03    0.09    0.22 1.00
2190
## steps.pm:steps.pmd -0.00     0.05   -0.09    0.08 1.00
3070
## sigma_P_A.lag      -0.01     0.03   -0.07    0.05 1.00
7154
## sigma_N_A.lag      -0.00     0.03   -0.06    0.06 1.00
6636
## sigma_steps.pm     -0.04     0.16   -0.36    0.27 1.00
2065
## sigma_steps.pmd    -0.04     0.04   -0.11    0.03 1.00
2847
## sigma_steps.pm:steps.pmd -0.01     0.05   -0.11    0.08 1.00
3460
##           Tail_ESS
## Intercept           1459
## sigma_Intercept     2713
## day                 2213
## P_A.lag             2938
## N_A.lag             3248
## steps.pm            1949
## steps.pmd           3064
## steps.pm:steps.pmd 2913
## sigma_P_A.lag       3300
## sigma_N_A.lag       3360
## sigma_steps.pm      2028
## sigma_steps.pmd     2261
## sigma_steps.pm:steps.pmd 3009
##
## Samples were drawn using sampling(NUTS). For each parameter, Bulk_ESS

```

```
## and Tail_ESS are effective sample size measures, and Rhat is the potential
## scale reduction factor on split chains (at convergence, Rhat = 1).
```

## Test hypothesis on correlation

### BF\_01 for null hypothesis

```
BF_01 <- hypothesis(fit_melsm, hypothesis =
"record_id__Intercept__sigma_steps.pmd = 0", class = "cor")
round( BF_01$hypothesis[1,7], 2)

## [1] 0.41
```

### BF\_10 for alternative hypothesis

Return the BF for the alternative hypothesis

```
round( 1/BF_01$hypothesis[1,7], 2)

## [1] 2.45
```

## Multivariate mixed effects location scale model

Depending on computer, this can take from 1-several days for the full dataset

The multivariate outcome is defined by the use of `mvbind()` which binds both PA and NA vectors to a brms object matrix.

```
## Explicitly allow correlations among residuals of Location and scale
## This avoids a warnnig
set_rescor(rescor = TRUE)

## [1] TRUE
## attr("class")
## [1] "setrescor"

fit_m_melsm <- brm(bf(
  # Location
  mvbind(P_A.std, N_A.std) ~ 1 + day + P_A.lag + N_A.lag + steps.pm*steps.pmd
+ (1 + day + steps.pmd | c | record_id),
  # scale (the c in |c| allows for correlation between location and scale)
  sigma ~ 1 + P_A.lag + N_A.lag + steps.pm*steps.pmd + (1 + steps.pmd | c |
record_id)),
  data=dats, inits = 0,
  # sample prior for Bayes factors
  cores = 4, sample_prior = T)
```

Print model summary:

```
summary(fit_m_melsm )

## Warning: There were 1 divergent transitions after warmup. Increasing
adapt_delta
```

```

## above 0.8 may help. See http://mc-stan.org/misc/warnings.html#divergent-
## transitions-after-warmup

## Family: MV(gaussian, gaussian)
## Links: mu = identity; sigma = log
##          mu = identity; sigma = log
## Formula: P_A.std ~ 1 + day + P_A.lag + N_A.lag + steps.pm * steps.pmd + (1
+ day + steps.pmd | c | record_id)
##          sigma ~ 1 + P_A.lag + N_A.lag + steps.pm * steps.pmd + (1 +
steps.pmd | c | record_id)
##          N_A.std ~ 1 + day + P_A.lag + N_A.lag + steps.pm * steps.pmd + (1
+ day + steps.pmd | c | record_id)
##          sigma ~ 1 + P_A.lag + N_A.lag + steps.pm * steps.pmd + (1 +
steps.pmd | c | record_id)
## Data:  dats (Number of observations: 1851)
## Samples: 4 chains, each with iter = 2000; warmup = 1000; thin = 1;
##          total post-warmup samples = 4000
##
## Group-Level Effects:
## ~record_id (Number of levels: 30)
##
##          Estimate Est.Error l-95%
CI
## sd(PAstd_Intercept)          0.68      0.10
0.51
## sd(PAstd_day)                0.01      0.00
0.00
## sd(PAstd_steps.pmd)         0.14      0.03
0.09
## sd(sigma_PAstd_Intercept)    0.53      0.08
0.40
## sd(sigma_PAstd_steps.pmd)    0.14      0.04
0.07
## sd(NAstd_Intercept)         0.44      0.07
0.32
## sd(NAstd_day)               0.00      0.00
0.00
## sd(NAstd_steps.pmd)         0.03      0.01
0.01
## sd(sigma_NAstd_Intercept)    0.56      0.08
0.44
## sd(sigma_NAstd_steps.pmd)    0.19      0.05
0.10
## cor(PAstd_Intercept,PAstd_day) -0.33     0.16   -
0.61
## cor(PAstd_Intercept,PAstd_steps.pmd) -0.12     0.18   -
0.47
## cor(PAstd_day,PAstd_steps.pmd) -0.27     0.21   -
0.63
## cor(PAstd_Intercept,sigma_PAstd_Intercept) -0.19     0.17   -
0.50

```

|                                                             |       |      |   |
|-------------------------------------------------------------|-------|------|---|
| ## cor(PAstd_day,sigma_PAstd_Intercept)<br>0.42             | -0.06 | 0.19 | - |
| ## cor(PAstd_steps.pmd,sigma_PAstd_Intercept)<br>0.09       | 0.30  | 0.19 | - |
| ## cor(PAstd_Intercept,sigma_PAstd_steps.pmd)<br>0.55       | -0.18 | 0.21 | - |
| ## cor(PAstd_day,sigma_PAstd_steps.pmd)<br>0.49             | -0.07 | 0.22 | - |
| ## cor(PAstd_steps.pmd,sigma_PAstd_steps.pmd)<br>0.50       | -0.07 | 0.23 | - |
| ## cor(sigma_PAstd_Intercept,sigma_PAstd_steps.pmd)<br>0.32 | 0.13  | 0.22 | - |
| ## cor(PAstd_Intercept,NAstd_Intercept)<br>0.43             | -0.12 | 0.17 | - |
| ## cor(PAstd_day,NAstd_Intercept)<br>0.01                   | 0.33  | 0.17 | - |
| ## cor(PAstd_steps.pmd,NAstd_Intercept)<br>0.46             | -0.09 | 0.19 | - |
| ## cor(sigma_PAstd_Intercept,NAstd_Intercept)<br>0.13       | 0.21  | 0.16 | - |
| ## cor(sigma_PAstd_steps.pmd,NAstd_Intercept)<br>0.13       | 0.26  | 0.20 | - |
| ## cor(PAstd_Intercept,NAstd_day)<br>0.61                   | -0.26 | 0.19 | - |
| ## cor(PAstd_day,NAstd_day)<br>0.55                         | -0.15 | 0.22 | - |
| ## cor(PAstd_steps.pmd,NAstd_day)<br>0.23                   | 0.23  | 0.22 | - |
| ## cor(sigma_PAstd_Intercept,NAstd_day)<br>0.46             | -0.06 | 0.21 | - |
| ## cor(sigma_PAstd_steps.pmd,NAstd_day)<br>0.32             | 0.16  | 0.24 | - |
| ## cor(NAstd_Intercept,NAstd_day)<br>0.58                   | -0.20 | 0.20 | - |
| ## cor(PAstd_Intercept,NAstd_steps.pmd)<br>0.21             | 0.29  | 0.24 | - |
| ## cor(PAstd_day,NAstd_steps.pmd)<br>0.46                   | 0.08  | 0.27 | - |
| ## cor(PAstd_steps.pmd,NAstd_steps.pmd)<br>0.57             | -0.10 | 0.25 | - |
| ## cor(sigma_PAstd_Intercept,NAstd_steps.pmd)<br>0.51       | -0.05 | 0.24 | - |
| ## cor(sigma_PAstd_steps.pmd,NAstd_steps.pmd)<br>0.62       | -0.16 | 0.26 | - |
| ## cor(NAstd_Intercept,NAstd_steps.pmd)<br>0.59             | -0.09 | 0.27 | - |
| ## cor(NAstd_day,NAstd_steps.pmd)<br>0.67                   | -0.17 | 0.28 | - |
| ## cor(PAstd_Intercept,sigma_NAstd_Intercept)<br>0.67       | -0.42 | 0.14 | - |

|                                                             |          |      |          |
|-------------------------------------------------------------|----------|------|----------|
| ## cor(PAstd_day,sigma_NAstd_Intercept)<br>0.27             | 0.08     | 0.17 | -        |
| ## cor(PAstd_steps.pmd,sigma_NAstd_Intercept)<br>0.27       | 0.08     | 0.18 | -        |
| ## cor(sigma_PAstd_Intercept,sigma_NAstd_Intercept)<br>0.21 | 0.51     | 0.14 |          |
| ## cor(sigma_PAstd_steps.pmd,sigma_NAstd_Intercept)<br>0.08 | 0.47     | 0.18 |          |
| ## cor(NAstd_Intercept,sigma_NAstd_Intercept)<br>0.15       | 0.46     | 0.14 |          |
| ## cor(NAstd_day,sigma_NAstd_Intercept)<br>0.52             | -0.18    | 0.18 | -        |
| ## cor(NAstd_steps.pmd,sigma_NAstd_Intercept)<br>0.56       | -0.13    | 0.23 | -        |
| ## cor(PAstd_Intercept,sigma_NAstd_steps.pmd)<br>0.32       | 0.05     | 0.19 | -        |
| ## cor(PAstd_day,sigma_NAstd_steps.pmd)<br>0.21             | 0.24     | 0.22 | -        |
| ## cor(PAstd_steps.pmd,sigma_NAstd_steps.pmd)<br>0.36       | 0.08     | 0.22 | -        |
| ## cor(sigma_PAstd_Intercept,sigma_NAstd_steps.pmd)<br>0.18 | 0.21     | 0.19 | -        |
| ## cor(sigma_PAstd_steps.pmd,sigma_NAstd_steps.pmd)<br>0.56 | -0.11    | 0.24 | -        |
| ## cor(NAstd_Intercept,sigma_NAstd_steps.pmd)<br>0.19       | 0.20     | 0.19 | -        |
| ## cor(NAstd_day,sigma_NAstd_steps.pmd)<br>0.54             | -0.07    | 0.24 | -        |
| ## cor(NAstd_steps.pmd,sigma_NAstd_steps.pmd)<br>0.24       | 0.30     | 0.25 | -        |
| ## cor(sigma_NAstd_Intercept,sigma_NAstd_steps.pmd)<br>0.27 | 0.11     | 0.19 | -        |
| ##                                                          | u-95% CI | Rhat | Bulk_ESS |
| ## sd(PAstd_Intercept)                                      | 0.89     | 1.00 | 1042     |
| ## sd(PAstd_day)                                            | 0.01     | 1.00 | 1075     |
| ## sd(PAstd_steps.pmd)                                      | 0.20     | 1.00 | 1911     |
| ## sd(sigma_PAstd_Intercept)                                | 0.71     | 1.00 | 1529     |
| ## sd(sigma_PAstd_steps.pmd)                                | 0.24     | 1.00 | 1534     |
| ## sd(NAstd_Intercept)                                      | 0.60     | 1.00 | 1899     |
| ## sd(NAstd_day)                                            | 0.01     | 1.00 | 2082     |
| ## sd(NAstd_steps.pmd)                                      | 0.07     | 1.00 | 1526     |
| ## sd(sigma_NAstd_Intercept)                                | 0.73     | 1.00 | 2010     |
| ## sd(sigma_NAstd_steps.pmd)                                | 0.30     | 1.00 | 2148     |
| ## cor(PAstd_Intercept,PAstd_day)                           | 0.01     | 1.00 | 1279     |
| ## cor(PAstd_Intercept,PAstd_steps.pmd)                     | 0.24     | 1.00 | 2224     |
| ## cor(PAstd_day,PAstd_steps.pmd)                           | 0.17     | 1.00 | 1966     |
| ## cor(PAstd_Intercept,sigma_PAstd_Intercept)               | 0.16     | 1.00 | 1599     |
| ## cor(PAstd_day,sigma_PAstd_Intercept)                     | 0.31     | 1.00 | 1104     |
| ## cor(PAstd_steps.pmd,sigma_PAstd_Intercept)               | 0.63     | 1.00 | 938      |
| ## cor(PAstd_Intercept,sigma_PAstd_steps.pmd)               | 0.25     | 1.00 | 3360     |

|                                                     |       |          |      |
|-----------------------------------------------------|-------|----------|------|
| ## cor(PAstd_day,sigma_PAstd_steps.pmd)             | 0.35  | 1.00     | 3006 |
| ## cor(PAstd_steps.pmd,sigma_PAstd_steps.pmd)       | 0.38  | 1.00     | 3003 |
| ## cor(sigma_PAstd_Intercept,sigma_PAstd_steps.pmd) | 0.55  | 1.00     | 3863 |
| ## cor(PAstd_Intercept,NAstd_Intercept)             | 0.22  | 1.00     | 1956 |
| ## cor(PAstd_day,NAstd_Intercept)                   | 0.63  | 1.00     | 1851 |
| ## cor(PAstd_steps.pmd,NAstd_Intercept)             | 0.28  | 1.00     | 1744 |
| ## cor(sigma_PAstd_Intercept,NAstd_Intercept)       | 0.50  | 1.00     | 2528 |
| ## cor(sigma_PAstd_steps.pmd,NAstd_Intercept)       | 0.62  | 1.00     | 1699 |
| ## cor(PAstd_Intercept,NAstd_day)                   | 0.12  | 1.00     | 2520 |
| ## cor(PAstd_day,NAstd_day)                         | 0.29  | 1.00     | 2585 |
| ## cor(PAstd_steps.pmd,NAstd_day)                   | 0.64  | 1.00     | 2282 |
| ## cor(sigma_PAstd_Intercept,NAstd_day)             | 0.36  | 1.00     | 3181 |
| ## cor(sigma_PAstd_steps.pmd,NAstd_day)             | 0.60  | 1.00     | 1787 |
| ## cor(NAstd_Intercept,NAstd_day)                   | 0.21  | 1.00     | 3997 |
| ## cor(PAstd_Intercept,NAstd_steps.pmd)             | 0.71  | 1.00     | 4343 |
| ## cor(PAstd_day,NAstd_steps.pmd)                   | 0.58  | 1.00     | 5313 |
| ## cor(PAstd_steps.pmd,NAstd_steps.pmd)             | 0.40  | 1.00     | 4480 |
| ## cor(sigma_PAstd_Intercept,NAstd_steps.pmd)       | 0.42  | 1.00     | 4716 |
| ## cor(sigma_PAstd_steps.pmd,NAstd_steps.pmd)       | 0.38  | 1.00     | 3881 |
| ## cor(NAstd_Intercept,NAstd_steps.pmd)             | 0.47  | 1.00     | 3788 |
| ## cor(NAstd_day,NAstd_steps.pmd)                   | 0.39  | 1.00     | 3369 |
| ## cor(PAstd_Intercept,sigma_NAstd_Intercept)       | -0.11 | 1.00     | 2448 |
| ## cor(PAstd_day,sigma_NAstd_Intercept)             | 0.41  | 1.00     | 1577 |
| ## cor(PAstd_steps.pmd,sigma_NAstd_Intercept)       | 0.41  | 1.00     | 1997 |
| ## cor(sigma_PAstd_Intercept,sigma_NAstd_Intercept) | 0.74  | 1.00     | 2580 |
| ## cor(sigma_PAstd_steps.pmd,sigma_NAstd_Intercept) | 0.78  | 1.00     | 1729 |
| ## cor(NAstd_Intercept,sigma_NAstd_Intercept)       | 0.70  | 1.00     | 3412 |
| ## cor(NAstd_day,sigma_NAstd_Intercept)             | 0.18  | 1.00     | 2708 |
| ## cor(NAstd_steps.pmd,sigma_NAstd_Intercept)       | 0.33  | 1.00     | 2527 |
| ## cor(PAstd_Intercept,sigma_NAstd_steps.pmd)       | 0.41  | 1.00     | 3512 |
| ## cor(PAstd_day,sigma_NAstd_steps.pmd)             | 0.64  | 1.00     | 2581 |
| ## cor(PAstd_steps.pmd,sigma_NAstd_steps.pmd)       | 0.51  | 1.00     | 2819 |
| ## cor(sigma_PAstd_Intercept,sigma_NAstd_steps.pmd) | 0.56  | 1.00     | 4572 |
| ## cor(sigma_PAstd_steps.pmd,sigma_NAstd_steps.pmd) | 0.37  | 1.00     | 1859 |
| ## cor(NAstd_Intercept,sigma_NAstd_steps.pmd)       | 0.55  | 1.00     | 3817 |
| ## cor(NAstd_day,sigma_NAstd_steps.pmd)             | 0.40  | 1.00     | 2380 |
| ## cor(NAstd_steps.pmd,sigma_NAstd_steps.pmd)       | 0.73  | 1.00     | 1926 |
| ## cor(sigma_NAstd_Intercept,sigma_NAstd_steps.pmd) | 0.47  | 1.00     | 3765 |
| ##                                                  |       |          |      |
| ## sd(PAstd_Intercept)                              |       | Tail_ESS | 1883 |
| ## sd(PAstd_day)                                    |       |          | 2259 |
| ## sd(PAstd_steps.pmd)                              |       |          | 2719 |
| ## sd(sigma_PAstd_Intercept)                        |       |          | 2387 |
| ## sd(sigma_PAstd_steps.pmd)                        |       |          | 1917 |
| ## sd(NAstd_Intercept)                              |       |          | 2486 |
| ## sd(NAstd_day)                                    |       |          | 2800 |
| ## sd(NAstd_steps.pmd)                              |       |          | 1105 |
| ## sd(sigma_NAstd_Intercept)                        |       |          | 2877 |
| ## sd(sigma_NAstd_steps.pmd)                        |       |          | 2290 |
| ## cor(PAstd_Intercept,PAstd_day)                   |       |          | 2232 |



```

## cor(PAstd_Intercept,PAstd_steps.pmd)                2839
## cor(PAstd_day,PAstd_steps.pmd)                      2334
## cor(PAstd_Intercept,sigma_PAstd_Intercept)         2018
## cor(PAstd_day,sigma_PAstd_Intercept)               1802
## cor(PAstd_steps.pmd,sigma_PAstd_Intercept)         1523
## cor(PAstd_Intercept,sigma_PAstd_steps.pmd)         2872
## cor(PAstd_day,sigma_PAstd_steps.pmd)               2833
## cor(PAstd_steps.pmd,sigma_PAstd_steps.pmd)         2966
## cor(sigma_PAstd_Intercept,sigma_PAstd_steps.pmd)   3279
## cor(PAstd_Intercept,NAstd_Intercept)               2465
## cor(PAstd_day,NAstd_Intercept)                     2761
## cor(PAstd_steps.pmd,NAstd_Intercept)               2453
## cor(sigma_PAstd_Intercept,NAstd_Intercept)         2773
## cor(sigma_PAstd_steps.pmd,NAstd_Intercept)         2620
## cor(PAstd_Intercept,NAstd_day)                    2914
## cor(PAstd_day,NAstd_day)                           3205
## cor(PAstd_steps.pmd,NAstd_day)                     2985
## cor(sigma_PAstd_Intercept,NAstd_day)               3446
## cor(sigma_PAstd_steps.pmd,NAstd_day)               2617
## cor(NAstd_Intercept,NAstd_day)                    3164
## cor(PAstd_Intercept,NAstd_steps.pmd)               3041
## cor(PAstd_day,NAstd_steps.pmd)                    2858
## cor(PAstd_steps.pmd,NAstd_steps.pmd)               3714
## cor(sigma_PAstd_Intercept,NAstd_steps.pmd)         3395
## cor(sigma_PAstd_steps.pmd,NAstd_steps.pmd)         3110
## cor(NAstd_Intercept,NAstd_steps.pmd)               3172
## cor(NAstd_day,NAstd_steps.pmd)                    3084
## cor(PAstd_Intercept,sigma_NAstd_Intercept)         2864
## cor(PAstd_day,sigma_NAstd_Intercept)               2360
## cor(PAstd_steps.pmd,sigma_NAstd_Intercept)         2892
## cor(sigma_PAstd_Intercept,sigma_NAstd_Intercept)   2968
## cor(sigma_PAstd_steps.pmd,sigma_NAstd_Intercept)   3043
## cor(NAstd_Intercept,sigma_NAstd_Intercept)         3105
## cor(NAstd_day,sigma_NAstd_Intercept)               3075
## cor(NAstd_steps.pmd,sigma_NAstd_Intercept)         3036
## cor(PAstd_Intercept,sigma_NAstd_steps.pmd)         2964
## cor(PAstd_day,sigma_NAstd_steps.pmd)               3378
## cor(PAstd_steps.pmd,sigma_NAstd_steps.pmd)         3270
## cor(sigma_PAstd_Intercept,sigma_NAstd_steps.pmd)   3601
## cor(sigma_PAstd_steps.pmd,sigma_NAstd_steps.pmd)   2751
## cor(NAstd_Intercept,sigma_NAstd_steps.pmd)         3398
## cor(NAstd_day,sigma_NAstd_steps.pmd)               3074
## cor(NAstd_steps.pmd,sigma_NAstd_steps.pmd)         3075
## cor(sigma_NAstd_Intercept,sigma_NAstd_steps.pmd)   3303
##
## Population-Level Effects:
##                                     Estimate Est.Error l-95% CI u-95% CI Rhat
## PAstd_Intercept                    -0.04      0.13    -0.29    0.21 1.01
## sigma_PAstd_Intercept                -0.81      0.10    -1.02   -0.61 1.00
## NAstd_Intercept                      -0.05      0.09    -0.23    0.13 1.00

```

|                                   |       |          |          |       |      |
|-----------------------------------|-------|----------|----------|-------|------|
| ## sigma_NAstd_Intercept          | -0.88 | 0.11     | -1.09    | -0.67 | 1.00 |
| ## PAstd_day                      | -0.00 | 0.00     | -0.00    | 0.00  | 1.00 |
| ## PAstd_P_A.lag                  | 0.33  | 0.02     | 0.28     | 0.38  | 1.00 |
| ## PAstd_N_A.lag                  | 0.06  | 0.02     | 0.02     | 0.09  | 1.00 |
| ## PAstd_steps.pm                 | 0.13  | 0.18     | -0.22    | 0.49  | 1.01 |
| ## PAstd_steps.pmd                | 0.15  | 0.03     | 0.09     | 0.22  | 1.00 |
| ## PAstd_steps.pm:steps.pmd       | 0.00  | 0.05     | -0.09    | 0.10  | 1.00 |
| ## sigma_PAstd_P_A.lag            | -0.02 | 0.03     | -0.08    | 0.05  | 1.00 |
| ## sigma_PAstd_N_A.lag            | -0.01 | 0.03     | -0.07    | 0.04  | 1.00 |
| ## sigma_PAstd_steps.pm           | -0.06 | 0.15     | -0.35    | 0.24  | 1.00 |
| ## sigma_PAstd_steps.pmd          | -0.04 | 0.04     | -0.12    | 0.03  | 1.00 |
| ## sigma_PAstd_steps.pm:steps.pmd | -0.01 | 0.05     | -0.12    | 0.10  | 1.00 |
| ## NAstd_day                      | -0.00 | 0.00     | -0.00    | 0.00  | 1.00 |
| ## NAstd_P_A.lag                  | 0.01  | 0.02     | -0.02    | 0.04  | 1.00 |
| ## NAstd_N_A.lag                  | 0.32  | 0.03     | 0.27     | 0.37  | 1.00 |
| ## NAstd_steps.pm                 | -0.05 | 0.12     | -0.29    | 0.20  | 1.00 |
| ## NAstd_steps.pmd                | -0.03 | 0.02     | -0.06    | 0.00  | 1.00 |
| ## NAstd_steps.pm:steps.pmd       | 0.00  | 0.02     | -0.04    | 0.05  | 1.00 |
| ## sigma_NAstd_P_A.lag            | 0.08  | 0.03     | 0.02     | 0.14  | 1.00 |
| ## sigma_NAstd_N_A.lag            | 0.21  | 0.03     | 0.16     | 0.27  | 1.00 |
| ## sigma_NAstd_steps.pm           | -0.11 | 0.16     | -0.42    | 0.20  | 1.00 |
| ## sigma_NAstd_steps.pmd          | -0.06 | 0.05     | -0.15    | 0.03  | 1.00 |
| ## sigma_NAstd_steps.pm:steps.pmd | -0.04 | 0.07     | -0.17    | 0.09  | 1.00 |
| ##                                |       | Bulk_ESS | Tail_ESS |       |      |
| ## PAstd_Intercept                | 500   | 1006     |          |       |      |
| ## sigma_PAstd_Intercept          | 1275  | 1842     |          |       |      |
| ## NAstd_Intercept                | 1759  | 2244     |          |       |      |
| ## sigma_NAstd_Intercept          | 1170  | 2084     |          |       |      |
| ## PAstd_day                      | 1033  | 2000     |          |       |      |
| ## PAstd_P_A.lag                  | 5013  | 3109     |          |       |      |
| ## PAstd_N_A.lag                  | 5468  | 3298     |          |       |      |
| ## PAstd_steps.pm                 | 566   | 1156     |          |       |      |
| ## PAstd_steps.pmd                | 1653  | 2354     |          |       |      |
| ## PAstd_steps.pm:steps.pmd       | 1796  | 2137     |          |       |      |
| ## sigma_PAstd_P_A.lag            | 5510  | 2975     |          |       |      |
| ## sigma_PAstd_N_A.lag            | 4443  | 2935     |          |       |      |
| ## sigma_PAstd_steps.pm           | 1187  | 1998     |          |       |      |
| ## sigma_PAstd_steps.pmd          | 2400  | 2414     |          |       |      |
| ## sigma_PAstd_steps.pm:steps.pmd | 2693  | 2587     |          |       |      |
| ## NAstd_day                      | 2468  | 3063     |          |       |      |
| ## NAstd_P_A.lag                  | 6316  | 2572     |          |       |      |
| ## NAstd_N_A.lag                  | 5984  | 2523     |          |       |      |
| ## NAstd_steps.pm                 | 1830  | 2272     |          |       |      |
| ## NAstd_steps.pmd                | 2526  | 2253     |          |       |      |
| ## NAstd_steps.pm:steps.pmd       | 2634  | 2875     |          |       |      |
| ## sigma_NAstd_P_A.lag            | 6942  | 3013     |          |       |      |
| ## sigma_NAstd_N_A.lag            | 6758  | 3223     |          |       |      |
| ## sigma_NAstd_steps.pm           | 1293  | 1980     |          |       |      |
| ## sigma_NAstd_steps.pmd          | 3168  | 3091     |          |       |      |
| ## sigma_NAstd_steps.pm:steps.pmd | 2901  | 3012     |          |       |      |

```
##
## Residual Correlations:
##           Estimate Est.Error 1-95% CI u-95% CI Rhat Bulk_ESS
Tail_ESS
## rescor(PAstd,NAstd)    0.03    0.02   -0.02    0.07 1.00    7364
2963
##
## Samples were drawn using sampling(NUTS). For each parameter, Bulk_ESS
## and Tail_ESS are effective sample size measures, and Rhat is the potential
## scale reduction factor on split chains (at convergence, Rhat = 1).
```
